# Supplementary material for: Jasmonate signalling pathway in strawberry: Genome-wide identification, molecular characterization and expression of JAZs and MYCs during fruit development and ripening
Source: PubMed Central journal article supplement (PMC5944998; doi:10.1371/journal.pone.0197118), 2018-05-10
Supplement: pone.0197118.s007.pdf [file pone.0197118.s007.pdf]

**S1 Table. Predicted mRNA sequences of *Fragaria vesca* using JA signalling-related protein sequences of *Arabidopsis thaliana* as queries and Refseq-rna database of *F. vesca* as subject.**

| <i>A. thaliana</i> |              | tblastn |                 |         |              | <i>Fragaria vesca</i>                            |              |                       |
|--------------------|--------------|---------|-----------------|---------|--------------|--------------------------------------------------|--------------|-----------------------|
| Protein            | Accession    | Score   | Query cover (%) | E-value | Identity (%) | Predicted mRNA                                   | Accession    | Name <sup>a</sup>     |
| AtJAZ1             | NP_564075    | 127     | 99              | 2e-33   | 36           | TIFY 10A (LOC101302102)                          | XM_004287607 | <i>JAZ1/TIFY10a</i>   |
|                    |              | 107     | 60              | 2e-16   | 37           | TIFY 11A-like (LOC101305492)                     | XM_004303663 | <i>JAZ5/TFY11a</i>    |
| AtJAZ2             | NP_565096    | 122     | 93              | 2e-31   | 34           | TIFY 10A (LOC101302102)                          | XM_004287607 | <i>JAZ1/TIFY10a</i>   |
|                    |              | 191     | 95              | 1e-54   | 42           | TIFY 6B (LOC101303423)                           | XM_004299468 | <i>JAZ9/TIFY6b</i>    |
|                    |              | 156     | 94              | 3e-42   | 38           | TIFY 6B (LOC101298700),<br>transcript variant X3 | XM_011464880 | <i>JAZ4-3/TIFY6b</i>  |
|                    |              | 146     | 94              | 2e-38   | 35           | TIFY 6B (LOC101298700),<br>transcript variant X2 | XM_011464878 | <i>JAZ4-2/TIFY6b</i>  |
| AtJAZ3             | NP_566590    | 145     | 94              | 3e-38   | 35           | TIFY 6B (LOC101298700),<br>transcript variant X1 | XM_004297401 | <i>JAZ34-1/TIFY6b</i> |
|                    |              | 138     | 99              | 1e-36   | 35           | TIFY 6B (LOC101303423)                           | XM_004299468 | <i>JAZ9/TIFY6b</i>    |
|                    |              | 127     | 99              | 1e-32   | 35           | TIFY 6B (LOC101298700),<br>transcript variant X3 | XM_011464880 | <i>JAZ4-3/TIFY6b</i>  |
|                    |              | 127     | 99              | 3e-30   | 34           | TIFY 6B (LOC101298700),<br>transcript variant X2 | XM_011464878 | <i>JAZ4-2/TIFY6b</i>  |
| AtJAZ4             | NP_001117450 | 120     | 99              | 4e-30   | 34           | TIFY 6B (LOC101298700),<br>transcript variant X1 | XM_004297401 | <i>JAZ4-1/TIFY6b</i>  |
|                    |              | 75.5    | 75              | 4e-15   | 28           | TIFY 10A-like (LOC101302102)                     | XM_004287607 | <i>JAZ1/TIFY10a</i>   |
| AtJAZ5             | NP_564019    | 68.6    | 77              | 7e-13   | 31           | TIFY 11A-like (LOC101305492)                     | XM_004303663 | <i>JAZ5/TFY11a</i>    |
|                    |              | 74.7    | 78              | 8e-15   | 26           | TIFY 10A-like (LOC101302102)                     | XM_004287607 | <i>JAZ1/TIFY10a</i>   |
| AtJAZ6             | NP_565043    | 100     | 68              | 9e-12   | 33           | TIFY 11A-like (LOC101305492)                     | XM_004303663 | <i>JAZ5/TFY11a</i>    |
|                    |              | 68.9    | 85              | 3e-14   | 41           | TIFY 5A-like (LOC101295112)                      | XM_004293578 | <i>JAZ8.1/TIFY5a</i>  |
| AtJAZ7             | NP_181007    | 42.4    | 56              | 6e-05   | 35           | TIFY 5B (LOC105352369)                           | XM_011469361 | <i>JAZ7/TIFY5b</i>    |
|                    |              | 79.3    | 96              | 4e-18   | 43           | TIFY 5A-like (LOC101295112)                      | XM_004293578 | <i>JAZ8.1/TIFY5a</i>  |
| AtJAZ8             | NP_564349    | 94.4    | 98              | 3e-21   | 29           | TIFY 6B (LOC101298700),<br>transcript variant X3 | XM_011464880 | <i>JAZ4-3/TIFY6b</i>  |
|                    |              | 86.6    | 91              | 2e-19   | 31           | TIFY 6B (LOC101303423)                           | XM_004299468 | <i>JAZ9/TIFY6b</i>    |
|                    |              | 82.8    | 98              | 2e-17   | 28           | TIFY 6B (LOC101298700),<br>transcript variant X2 | XM_011464878 | <i>JAZ4-2/TIFY6b</i>  |
|                    |              | 82.4    | 98              | 3e-17   | 28           | TIFY 6B (LOC101298700),<br>transcript variant X1 | XM_004297401 | <i>JAZ4-1/TIFY6b</i>  |
| AtJAZ9             | NP_177227    | 82.8    | 98              | 2e-17   | 28           | TIFY 6B (LOC101298700),<br>transcript variant X2 | XM_011464878 | <i>JAZ4-2/TIFY6b</i>  |
|                    |              | 82.4    | 98              | 3e-17   | 28           | TIFY 6B (LOC101298700),<br>transcript variant X1 | XM_004297401 | <i>JAZ4-1/TIFY6b</i>  |

|           |              |      |     |        |    |                                                |              |                     |
|-----------|--------------|------|-----|--------|----|------------------------------------------------|--------------|---------------------|
| AtJAZ10   | NP_001154713 | 58.2 | 78  | 6e-10  | 32 | TIFY 9-like (LOC101299545)                     | XM_004310081 | <i>JAZ10/TIFY9</i>  |
|           |              | 137  | 78  | 1e-15  | 38 | TIFY 3A-like (LOC105349490)                    | XM_011459279 | <i>JAZ11/TIFY3a</i> |
| AtJAZ11   | NP_189930    | 122  | 75  | 4e-13  | 40 | TIFY 3B (LOC101312185)                         | XM_004287641 | <i>JAZ12/TIFY3b</i> |
|           |              | 53.5 | 41  | 7e-08  | 35 | TIFY 9-like (LOC101299545)                     | XM_004310081 | <i>JAZ10/TIFY9</i>  |
|           |              | 47   | 77  | 8e-06  | 25 | TIFY 6B (LOC101303423)                         | XM_011464880 | <i>JAZ9/TIFY6b</i>  |
| AtJAZ12   | NP_197590    | 102  | 61  | 1e-25  | 48 | TIFY 3B-like (LOC101312185)                    | XM_004287641 | <i>JAZ12/TIFY3b</i> |
|           |              | 78.2 | 57  | 2e-17  | 41 | TIFY 3A-like (LOC105349490)                    | XM_011459279 | <i>JAZ11/TIFY3a</i> |
|           |              | 68.6 | 65  | 2e-13  | 30 | TIFY 10A-like (LOC101302102)                   | XM_004287607 | <i>JAZ1/TIFY10a</i> |
|           |              | 56.2 | 58  | 3e-09  | 36 | TIFY 9-like (LOC101299545)                     | XM_004310081 | <i>JAZ10/TIFY9</i>  |
| AtJAZ13   | NP_001078200 | 50.1 | 81  | 6e-08  | 32 | TIFY 5B (LOC105352369)                         | XM_011469361 | <i>JAZ7/TIFY5b</i>  |
| AtNINJA   | NP_849467    | 327  | 89  | 5e-95  | 45 | Ninja-family protein mc410-like (LOC101314595) | XM_004287404 | <i>NINJA</i>        |
|           |              | 2004 | 100 | 0.0    | 81 | TOPLESS-like (LOC101309271)                    | XM_004303220 | <i>TPL1</i>         |
| AtTOPLESS | NP_849672    | 1653 | 97  | 0.0    | 68 | Topless-related protein 4-like (LOC101312083)  | XM_004287239 | <i>TPL2</i>         |
|           |              | 1491 | 98  | 0.0    | 63 | TOPLESS-like (LOC101312083)                    | XM_004307834 | <i>TPL3</i>         |
|           |              | 1391 | 99  | 0.0    | 60 | Topless-related protein 2-like (LOC101296764)  | XM_004296832 | <i>TPL4</i>         |
| AtHDA6    | ACA97993     | 765  | 93  | 0.0    | 81 | histone deacetylase 6-like (LOC101309835)      | XM_004299084 | <i>HDA6.1</i>       |
|           |              | 651  | 87  | 0.0    | 71 | histone deacetylase 6-like (LOC101314516)      | XM_004289555 | <i>HDA6.2</i>       |
| AtHDA19   | NP_195526    | 838  | 97  | 0.0    | 83 | histone deacetylase 19-like (LOC101311924)     | XM_004290052 | <i>HDA19.1</i>      |
|           |              | 531  | 79  | 3e-169 | 59 | histone deacetylase 19-like (LOC101296668)     | XM_004299996 | <i>HDA19.2</i>      |
| AtMYC2    | NP_174541    | 584  | 100 | 0.0    | 49 | transcription factor MYC2-like (LOC101308180)  | XM_004300191 | <i>MYC2</i>         |
|           |              | 347  | 59  | 1e-54  | 53 | transcription factor MYC2-like (LOC101299702)  | XM_004306579 | <i>MYC2-like</i>    |
| AtMYC3    | NP_19448     | 530  | 80  | 6e-83  | 59 | transcription factor MYC2-like (LOC101308180)  | XM_004300191 | <i>MYC2</i>         |
|           |              | 297  | 61  | 3e-45  | 47 | transcription factor MYC2-like (LOC101299702)  | XM_004306579 | <i>MYC2-like</i>    |
| AtMYC4    | NP_193522    | 550  | 87  | 3e-90  | 62 | transcription factor MYC2-like (LOC101308180)  | XM_004300191 | <i>MYC2</i>         |
|           |              | 293  | 59  | 1e-44  | 47 | transcription factor MYC2-like (LOC101299702)  | XM_004306579 | <i>MYC2-like</i>    |

|        |           |     |     |        |    |                                                    |              |                      |
|--------|-----------|-----|-----|--------|----|----------------------------------------------------|--------------|----------------------|
| AtMYC5 | NP_199495 | 352 | 72  | 7e-51  | 56 | transcription factor MYC2-like (LOC101308180)      | XM_004300191 | <i>MYC2</i>          |
|        |           | 239 | 93  | 6e-70  | 34 | transcription factor MYC2-like (LOC101299702)      | XM_004306579 | <i>MYC2-like</i>     |
| AtJAM1 | NP_566078 | 489 | 94  | 2e-163 | 48 | transcription factor bHLH3-like (LOC101309083)     | XM_004306609 | <i>JAM1</i>          |
|        |           | 330 | 96  | 1e-101 | 38 | transcription factor bHLH3-like (LOC101302795)     | XM_011459681 | <i>JAM2</i>          |
| AtJAM2 | NP_171634 | 510 | 99  | 5e-171 | 47 | transcription factor bHLH3-like (LOC101309083)     | XM_004306609 | <i>JAM1</i>          |
|        |           | 327 | 71  | 5e-44  | 38 | transcription factor bHLH3-like (LOC101302795)     | XM_011459681 | <i>JAM2</i>          |
| AtJAM3 | NP_193376 | 505 | 100 | 3e-170 | 53 | transcription factor bHLH3-like (LOC101302795)     | XM_011459681 | <i>JAM2</i>          |
|        |           | 340 | 93  | 3e-53  | 52 | transcription factor bHLH3-like (LOC101309083)     | XM_004306609 | <i>JAM1</i>          |
| AtPPD1 | NP_567442 | 184 | 996 | 2e-53  | 40 | TIFY 4B-like (LOC101296196), transcript variant X1 | XM_004296526 | <i>PPD1-1/TIFY4B</i> |
|        |           | 177 | 74  | 3e-51  | 43 | TIFY 4B-like (LOC101296196), transcript variant X2 | XM_011464153 | <i>PPD1-2/TIFY4B</i> |
| AtPPD2 | NP_193208 | 204 | 94  | 3e-61  | 42 | TIFY 4B-like (LOC101296196), transcript variant X1 | XM_004296526 | <i>PPD1-1/TIFY4B</i> |
|        |           | 191 | 76  | 1e-56  | 44 | TIFY 4B-like (LOC101296196), transcript variant X2 | XM_011464153 | <i>PPD1-2/TIFY4B</i> |

COI1, coronatine insensitive 1; HDA, histone deacetylase; JAM, jasmonate-associated MYC2-like; JAZ, jasmonate-ZIM-domain; NINJA, novel interactor of JAZ; TPL, TOPLESS; PPD, PEAPOD.

<sup>a</sup>This refers to the gene names assigned in the present research.
