# Supplementary material for: Jasmonate signalling pathway in strawberry: Genome-wide identification, molecular characterization and expression of JAZs and MYCs during fruit development and ripening
Source: PubMed Central journal article supplement (PMC5944998; doi:10.1371/journal.pone.0197118), 2018-05-10
Supplement: pone.0197118.s009.pdf [file pone.0197118.s009.pdf]

**S3 Table. Primers sequences used for RT-qPCR analysis of the genes analyzed in this research. The primers were designed from full-length cDNA sequences of *Fragaria vesca*. The primers for *COI1* and *GAPDH* genes were obtained from Preuss et al. (2014).**

| Gene (CDS)        | Forward (5'-3')              | Reverse (5'-3')          | Amplicon size (bp) |
|-------------------|------------------------------|--------------------------|--------------------|
| <i>COI1</i>       | TGATCTTTTGGGGATGGCTCGCCC     | TGAGCCGGATGCTCAACCACTACC | 117                |
| <i>JAZ1</i>       | TGGGAGATCTGAACCTCGTC         | TTCCTCGGTTTCTCCATCAC     | 130                |
| <i>JAZ4-1/2/3</i> | AGAAGTGCTGGTGACATTG          | TGGGCATAAATCTGGAGGAC     | 133                |
| <i>JAZ5</i>       | CACCATGAACTTGCTCAACG         | GAAAGGTCGCTGAAGACGAG     | 126                |
| <i>JAZ7</i>       | GGATGAGCAGACCAGACAGG         | AAACATAAACCCGGCCATCG     | 59                 |
| <i>JAZ8.1</i>     | GAGGAGGAACTGCAATTTGG         | AAGAGGGAAGCCGGAATTAG     | 64                 |
| <i>JAZ8.2</i>     | GTTGCAACCTGGAACCTGGAAC       | ATGAAGGGACTCAAGGGAGC     | 71                 |
| <i>JAZ9</i>       | TCCACAGCTCAATTGCAAAC         | ACCATCACCTGTGGAAGGAC     | 51                 |
| <i>JAZ10</i>      | TTCCAGAAGTTCCTCGAACG         | GATTTCTGGCTGCAATCAC      | 116                |
| <i>JAZ11</i>      | GGTTGCAGAAAGGGCAAAGC         | TTGCCAAAGGTATCCCTGCTC    | 95                 |
| <i>JAZ12</i>      | GAAGCGTAGGGACAGATTGG         | AACCGGAAGAAGCATCATTG     | 104                |
| <i>MYC2</i>       | AGGGGATCCTGTCGTTTACC         | TTCGGGGTCCACAACCTCTAC    | 149                |
| <i>MYC2-like</i>  | AGTCCATCCTCAACGACACC         | AACCACTCTGCGTCGGATAC     | 94                 |
| <i>NINJA</i>      | AAGCGATTGTTGGATCTGG          | ATTTGGGTCCACGCTACTTG     | 84                 |
| <i>TPL1</i>       | TGCTTACTCGAGGCACATTG         | GCTGCTTATTGGGGTGAGAG     | 128                |
| <i>TPL2</i>       | ATACTCTGTTTGCCCGCATC         | TTCCATCAGTTGCTGTCGAG     | 65                 |
| <i>TPL3</i>       | ATGATGCTCCTGGACTTTGG         | TTCACCGTCTTACCCGTTT      | 89                 |
| <i>TPL4</i>       | CGAATCCTCTGTTCCGAGAG         | AATGTCAGGATTTGGCCTTG     | 128                |
| <i>HDA6.1</i>     | GTTTGGCGATTTCTTTCCAG         | TCCGAAAATTCTCGTCATCC     | 116                |
| <i>HDA6.2</i>     | ATGGAGCTGAATCGGGTTGG         | GCAGTTAGTGTGAGGGGTGG     | 101                |
| <i>HDA19.1</i>    | CTACCTTCAGGACCAGACGC         | TGGTTGAGGCCGTAGTTGAC     | 149                |
| <i>HDA19.2</i>    | GGACAAGCAGCATTTGTTCTC        | ACCTACGTGCAGCATCTATCG    | 128                |
| <i>JAM1</i>       | GCTTTACGAGCTGTTGTGCC         | TTGAAGTGCCTCCTGCACTC     | 139                |
| <i>JAM2</i>       | GACAATTGGGTGTGACAGCAG        | TCCATCGCCCCAAATCAAGG     | 122                |
| <i>PPD1-1</i>     | CCTGAGGGTCAGGCAAGTAG         | CTCCAAGGTAGAAGTTGGTCCC   | 110                |
| <i>GAPDH</i>      | TTCATCACTACTGCCACCCAGAAGACTG | AGCAGGCAGAACCCTTCCGACAG  | 132                |

COI1, coronatine insensitive 1; GAPDH, glyceraldehyde-3-phosphate dehydrogenase; HDA, histone deacetylase; JAM, jasmonate-associated MYC2-like; JAZ, jasmonate-ZIM-domain; NINJA, novel interactor of JAZ; TPL, TOPLESS; PPD, PEAPOD.
