# Supplementary material for: Jasmonate signalling pathway in strawberry: Genome-wide identification, molecular characterization and expression of JAZs and MYCs during fruit development and ripening
Source: PubMed Central journal article supplement (PMC5944998; doi:10.1371/journal.pone.0197118), 2018-05-10
Supplement: pone.0197118.s010.pdf [file pone.0197118.s010.pdf]

**S4 Table. Identity (%) between *Arabidopsis thaliana* and *Fragaria vesca* JAZ proteins obtained by multiple alignment.**

|                             |       | <i>Fragaria vesca</i> |              |              |              |              |              |              |              |              |              |              |              |
|-----------------------------|-------|-----------------------|--------------|--------------|--------------|--------------|--------------|--------------|--------------|--------------|--------------|--------------|--------------|
|                             |       | JAZ1                  | JAZ4-1       | JAZ4-2       | JAZ4-3       | JAZ5         | JAZ7         | JAZ8.1       | JAZ8.2       | JAZ9         | JAZ10        | JAZ11        | JAZ12        |
| <i>Arabidopsis thaliana</i> | JAZ1  | <b>40.08</b>          | 22.41        | 22.94        | 23.19        | 36.46        | 21.43        | 25.23        | 23.14        | 22.77        | 26.87        | 26.81        | 29.45        |
|                             | JAZ2  | 38.17                 | 23.93        | 24.03        | 24.40        | 40.70        | 23.21        | 25.00        | 21.14        | 21.78        | 26.72        | 24.26        | 29.93        |
|                             | JAZ3  | 24.18                 | <b>39.12</b> | <b>38.94</b> | <b>39.82</b> | 29.79        | 19.64        | 26.96        | 23.62        | <b>45.92</b> | 32.62        | 29.19        | 26.32        |
|                             | JAZ4  | 23.96                 | 37.59        | 37.36        | 38.58        | 35.24        | 23.91        | 30.53        | 25.49        | 41.29        | <b>36.13</b> | <b>32.71</b> | 26.36        |
|                             | JAZ5  | 29.78                 | 21.15        | 21.26        | 22.40        | <b>43.86</b> | 21.36        | 23.30        | 21.43        | 22.07        | 22.73        | 26.00        | 21.94        |
|                             | JAZ6  | 28.82                 | 20.85        | 20.95        | 22.34        | 43.71        | 18.75        | 20.54        | 23.14        | 20.93        | 22.14        | 22.73        | 24.68        |
|                             | JAZ7  | 20.63                 | 19.67        | 19.67        | 19.67        | 27.84        | 30.84        | <b>47.01</b> | 36.29        | 22.61        | 22.76        | 23.00        | 25.93        |
|                             | JAZ8  | 23.97                 | 22.88        | 22.88        | 22.88        | 26.37        | <b>36.79</b> | 42.74        | <b>36.89</b> | 20.18        | 24.04        | 19.19        | 25.47        |
|                             | JAZ9  | 24.40                 | 38.37        | 38.37        | 39.27        | 29.91        | 22.22        | 25.23        | 20.83        | 35.88        | 27.56        | 27.54        | 23.61        |
|                             | JAZ10 | 16.53                 | 20.15        | 20.15        | 20.15        | 22.62        | 18.63        | 19.05        | 19.80        | 20.33        | 31.47        | 21.98        | 23.71        |
|                             | JAZ11 | 20.79                 | 20.00        | 19.65        | 20.38        | 20.90        | 15.74        | 21.70        | 17.24        | 24.54        | 22.83        | 27.07        | 33.33        |
|                             | JAZ12 | 23.03                 | 20.11        | 20.22        | 22.42        | 23.08        | 19.35        | 23.91        | 17.92        | 25.29        | 30.56        | 32.52        | <b>40.36</b> |
|                             | JAZ13 | 17.43                 | 16.53        | 16.53        | 16.53        | 18.00        | 27.45        | 30.19        | 27.93        | 20.87        | 18.42        | 17.12        | 16.36        |

Bold numbers indicate the highest identity of *F. vesca* TIFY and JAZ proteins comparing to *Arabidopsis*. JAZ, jasmonate ZIM-domain.
