# Supplementary material for: Jasmonate signalling pathway in strawberry: Genome-wide identification, molecular characterization and expression of JAZs and MYCs during fruit development and ripening
Source: PubMed Central journal article supplement (PMC5944998; doi:10.1371/journal.pone.0197118), 2018-05-10
Supplement: pone.0197118.s011.pdf [file pone.0197118.s011.pdf]

**S5 Table. Identity (%) between MYCs transcription factors sequences of *Arabidopsis thaliana* and *Fragaria vesca* obtained by multiple alignment.**

|                             |      | <i>Fragaria vesca</i> |              |
|-----------------------------|------|-----------------------|--------------|
|                             |      | MYC2                  | MYC2-like    |
| <i>Arabidopsis thaliana</i> | MYC2 | <b>58.51</b>          | <b>41.54</b> |
|                             | MYC3 | 54.16                 | 38.88        |
|                             | MYC4 | 58.27                 | 38.92        |
|                             | MYC5 | 45.56                 | 38.69        |

Bold numbers indicate the highest identity of *F. vesca* MYCs comparing to *Arabidopsis*.
