# Supplementary material for: Jasmonate signalling pathway in strawberry: Genome-wide identification, molecular characterization and expression of JAZs and MYCs during fruit development and ripening
Source: PubMed Central journal article supplement (PMC5944998; doi:10.1371/journal.pone.0197118), 2018-05-10
Supplement: pone.0197118.s012.pdf [file pone.0197118.s012.pdf]

**S6 Table. Basic information of JAZ/TIFY and MYC proteins of Arabidopsis and *Fragaria vesca*.**

| Arabidopsis  |              |             |                 | <i>Fragaria vesca</i> |              |             |           |
|--------------|--------------|-------------|-----------------|-----------------------|--------------|-------------|-----------|
| Protein      | Accession    | Length (aa) | EAR motif       | Protein <sup>a</sup>  | Accession    | Length (aa) | EAR motif |
| JAZ1/TIFY10a | NP_564075    | 253         |                 | JAZ1/TIFY10a          | XP_004287655 | 302         |           |
| JAZ2/TIFY10b | NP_565096    | 249         |                 | JAZ4.1/TIFY6b_X1      | XP_004297449 | 385         |           |
| JAZ3/TIFY6b  | NP_566590    | 352         |                 | JAZ4.2/TIFY6b_X2      | XP_011463180 | 384         |           |
| JAZ4/TIFY6a  | NP_001117450 | 310         |                 | JAZ4.3/TIFY6b_X3      | XP_011463182 | 360         |           |
| JAZ5/TIFY11a | NP_564019    | 274         | DLNEPT<br>LDLRL | JAZ5/TIFY11a          | XP_004303711 | 185         | LELRL     |
| JAZ6/TIFY11b | NP_565043    | 269         | DLNEPT<br>LELKL | JAZ7/TIFY5b           | XP_011467663 | 123         | LELGL     |
| JAZ7/TIFY5b  | NP_181007    | 148         | LELRL           | JAZ8.1/TIFY5a         | XP_004293626 | 130         | LELRL     |
| JAZ8/TIFY5a  | NP_564349    | 131         | LELRL           | JAZ8.2/TIFY5b         | XP_011460207 | 139         | LELRL     |
| JAZ9/TIFY7   | NP_177227    | 267         |                 | JAZ9/TIFY6b           | XP_004299516 | 371         |           |
| JAZ10/TIFY9  | NP_001154713 | 197         |                 | JAZ10/TIFY9           | XP_004310129 | 191         |           |
| JAZ11/TIFY3a | NP_189930    | 238         |                 | JAZ11/TIFY3a          | XP_011457581 | 186         |           |
| JAZ12/TIFY3b | NP_197590    | 187         |                 | JAZ12/TIFY3b          | XP_011461243 | 202         |           |
| JAZ13        | NP_001078200 | 125         |                 | MYC2                  | XP_004300239 | 682         |           |
| MYC2         | NP_174541    | 623         |                 | MYC2-like             | XP_004306627 | 491         |           |
| MYC3         | NP_199488    | 592         |                 |                       |              |             |           |
| MYC4         | NP_193522    | 589         |                 |                       |              |             |           |
| MYC5         | NP_199495    | 511         |                 |                       |              |             |           |

Arabidopsis and *F. vesca* TIFY, JAZ and MYCs proteins were obtained from GenPept database (NCBI).

<sup>a</sup> In GenPept database (NCBI) *Fragaria* JAZ proteins are named as TIFY proteins.
