# Supplementary material for: Jasmonate signalling pathway in strawberry: Genome-wide identification, molecular characterization and expression of JAZs and MYCs during fruit development and ripening
Source: PubMed Central journal article supplement (PMC5944998; doi:10.1371/journal.pone.0197118), 2018-05-10
Supplement: pone.0197118.s014.pdf [file pone.0197118.s014.pdf]

**S8 Table. Log<sub>10</sub> transformed values used for heatmaps construction of JA signalling-related genes during development and ripening of *Fragaria × ananassa* (cv. Aromas) fruit.**

| Gene                | Days after anthesis (developmental stages) |         |         |        |        |           |        |
|---------------------|--------------------------------------------|---------|---------|--------|--------|-----------|--------|
|                     | 0 (F)                                      | 10 (SG) | 17 (LG) | 20 (W) | 21 (T) | 23 (50%R) | 25 (R) |
| <i>FaCOI1</i>       | 0.21                                       | 0.08    | -0.05   | 0.00   | 0.09   | -0.04     | -0.33  |
| <i>FaMYC2</i>       | 1.28                                       | 0.75    | 0.29    | 0.06   | 0.05   | -0.16     | -0.54  |
| <i>FaMYC2-like</i>  | 0.62                                       | 0.60    | 0.14    | 0.00   | -0.30  | -0.32     | -0.44  |
| <i>FaJAZ1</i>       | 1.50                                       | 0.94    | 0.59    | 0.03   | -0.25  | -1.10     | -1.70  |
| <i>FaJAZ4-1/2/3</i> | 0.10                                       | 0.04    | 0.00    | 0.00   | -0.03  | -0.03     | -0.21  |
| <i>FaJAZ5</i>       | 1.17                                       | 0.81    | 0.43    | 0.06   | -0.17  | -0.80     | -0.96  |
| <i>FaJAZ7</i>       | 1.63                                       | 0.81    | 0.62    | 0.09   | -0.40  | -1.15     | -1.40  |
| <i>FaJAZ8.1</i>     | 1.47                                       | 0.95    | 1.03    | 0.07   | 0.09   | -0.77     | -0.74  |
| <i>FaJAZ8.2</i>     | 1.47                                       | 0.74    | 0.84    | 0.02   | -0.05  | -0.80     | -1.30  |
| <i>FaJAZ9</i>       | 0.74                                       | 0.45    | 0.40    | 0.00   | 0.42   | 0.17      | 0.14   |
| <i>FaJAZ10</i>      | 1.88                                       | 1.38    | 0.69    | 0.01   | -0.23  | nd        | nd     |
| <i>FaJAZ11</i>      | 0.66                                       | 0.27    | 0.08    | 0.01   | 0.28   | 0.24      | 0.11   |
| <i>FaJAZ12</i>      | 0.76                                       | 0.52    | 0.14    | 0.00   | -0.35  | -0.48     | -0.59  |
| <i>FaNINJA</i>      | 0.67                                       | 0.50    | 0.16    | 0.01   | -0.12  | -0.20     | -0.45  |
| <i>FaTPL1</i>       | 0.14                                       | -0.04   | -0.19   | 0.01   | -0.29  | -0.28     | -0.68  |
| <i>FaTPL2</i>       | 0.37                                       | 0.06    | -0.13   | 0.00   | 0.14   | 0.32      | 0.22   |
| <i>FaTPL3</i>       | 0.34                                       | 0.10    | -0.07   | 0.01   | 0.32   | 0.05      | 0.24   |
| <i>FaTPL4</i>       | 0.28                                       | 0.16    | -0.07   | 0.00   | -0.20  | -0.26     | -0.53  |
| <i>FaHDA6.1</i>     | 0.35                                       | 0.05    | -0.07   | 0.00   | 0.13   | 0.19      | 0.00   |
| <i>FaHDA6.2</i>     | 0.26                                       | 0.11    | 0.05    | 0.00   | -0.03  | 0.03      | -0.12  |
| <i>FaHDA19.1</i>    | 0.33                                       | 0.19    | 0.04    | 0.01   | -0.06  | -0.07     | -0.19  |
| <i>FaHDA19.2</i>    | 0.28                                       | 0.06    | -0.11   | 0.00   | 0.06   | 0.00      | -0.10  |
| <i>FaJAM1</i>       | 1.06                                       | 0.62    | 0.24    | 0.02   | 0.03   | -0.18     | -0.41  |
| <i>FaJAM2</i>       | 0.12                                       | 0.02    | -0.16   | 0.01   | -0.14  | -0.16     | -0.41  |

Developmental stages correspond to 0 (flowering, F), 10 (small green, SG), 17 (large green, LG), 20 (white, W), 21 (turning, T), 23 (50% red receptacle, 50%R), and 25 (100% red receptacle, R) days after anthesis (DAA). nd = no detection. COI1, coronatine insensitive 1; HDA, histone deacetylases; JAM, jasmonate-associated MYC2-like; JAZ, jasmonate ZIM-domain; NINJA, novel interactor of JAZ; TPL, TOPLESS.
