# Supplementary material for: Jasmonate signalling pathway in strawberry: Genome-wide identification, molecular characterization and expression of JAZs and MYCs during fruit development and ripening
Source: PubMed Central journal article supplement (PMC5944998; doi:10.1371/journal.pone.0197118), 2018-05-10
Supplement: pone.0197118.s015.pdf [file pone.0197118.s015.pdf]

**S9 Table. Relative expression of *FaMYC2*, *FaJAZ1* and *FaJAZ8.1* in MeJA-treated strawberry (*Fragaria × ananassa* cv. Aromas) fruit by RT-qPCR analysis.**

| Gene            | Treatment   |             |              |              |              |             |             |              |               |
|-----------------|-------------|-------------|--------------|--------------|--------------|-------------|-------------|--------------|---------------|
|                 | 0 min       | 15 min      |              | 30 min       |              | 1 h         |             | 6 h          |               |
|                 |             | Control     | MeJA         | Control      | MeJA         | Control     | MeJA        | Control      | MeJA          |
| <i>FaJAZ1</i>   | 1.01 ± 0.13 | 1.07 ± 0.24 | 1.47 ± 0.11  | 1.72 ± 0.26  | 3.06 ± 0.82* | 1.46 ± 0.28 | 1.80 ± 0.82 | 3.65 ± 2.63  | 2.63 ± 0.89   |
| <i>FaJAZ8.1</i> | 1.06 ± 0.39 | 7.24 ± 1.48 | 3.25 ± 2.78  | 12.24 ± 7.95 | 10.52 ± 0.45 | 9.74 ± 5.49 | 7.81 ± 0.06 | 14.19 ± 2.84 | 38.50 ± 9.68* |
| <i>FaMYC2</i>   | 1.00 ± 0.10 | 3.48 ± 0.18 | 6.32 ± 2.07* | 2.09 ± 0.47  | 5.84 ± 1.40* | 1.95 ± 0.56 | 3.26 ± 1.91 | 1.81 ± 0.17  | 3.94 ± 0.58*  |

Expression levels were measured at 0, 15, 30 min, 1 and 6 h under MeJA treatment. At each treatment and time, three biological replicates were used for the different analysis. Data were analyzed by one-way ANOVA test, and differences among means ± SE (n = 3) were determined using LSD test. Asterisks (\*) indicate significant differences between control and MeJA treatment ( $p \leq 0.05$ ) for each gene. JAZ, jasmonate ZIM-domain.
