# Supplementary material for: Jasmonate signalling pathway in strawberry: Genome-wide identification, molecular characterization and expression of JAZs and MYCs during fruit development and ripening
Source: PubMed Central journal article supplement (PMC5944998; doi:10.1371/journal.pone.0197118), 2018-05-10
Supplement: pone.0197118.s016.pdf [file pone.0197118.s016.pdf]

**S10 Table. Original FPKM values of JA signalling-related genes in achene and receptacle during development and ripening of *Fragaria × ananassa* (cv. Camarosa) fruit obtained from RNAseq experiments (Sanchez-Sevilla et al. 2017).**

| Gene                | Achene  |         |         |         | Receptacle |         |         |         |
|---------------------|---------|---------|---------|---------|------------|---------|---------|---------|
|                     | GA_FPKM | WA_FPKM | TA_FPKM | RA_FPKM | GR_FPKM    | WR_FPKM | TR_FPKM | RR_FPKM |
| <i>FaCOI1</i>       | 31.77   | 38.22   | 26.83   | 24.19   | 41.87      | 52.27   | 64.02   | 61.81   |
| <i>FaMYC2</i>       | 34.32   | 44.86   | 23.07   | 7.03    | 118.89     | 37.69   | 28.25   | 12.37   |
| <i>FaMYC2-like</i>  | 8.43    | 0.08    | 0.04    | 0.07    | 14.25      | 0.06    | 0.01    | 0.02    |
| <i>FaJAZ1</i>       | 114.14  | 95.92   | 105.64  | 69.26   | 258.17     | 7.92    | 2.16    | 2.76    |
| <i>FaJAZ4-1/2/3</i> | 12.64   | 21.43   | 21.92   | 13.00   | 21.53      | 25.35   | 28.32   | 27.10   |
| <i>FaJAZ5</i>       | 291.47  | 143.23  | 98.53   | 34.81   | 702.87     | 50.17   | 16.84   | 36.60   |
| <i>FaJAZ7</i>       | 9.40    | 0.57    | 0.81    | 0.24    | 27.54      | 0.01    | 0.00    | 0.06    |
| <i>FaJAZ8.1</i>     | 102.33  | 98.17   | 31.86   | 35.83   | 405.02     | 11.72   | 8.77    | 20.05   |
| <i>FaJAZ8.2</i>     | 7.76    | 3.20    | 0.25    | 0.62    | 35.87      | 0.70    | 0.10    | 0.25    |
| <i>FaJAZ9</i>       | 10.89   | 29.18   | 47.96   | 46.87   | 32.12      | 13.96   | 18.56   | 29.72   |
| <i>FaJAZ10</i>      | 49.44   | 7.39    | 1.54    | 1.40    | 107.17     | 1.18    | 0.40    | 2.29    |
| <i>FaJAZ11</i>      | 2.76    | 1.24    | 1.13    | 1.39    | 1.44       | 0.48    | 0.36    | 0.84    |
| <i>FaNINJA</i>      | 30.49   | 14.60   | 16.44   | 13.46   | 35.17      | 13.71   | 14.97   | 12.52   |
| <i>FaTPL1</i>       | 24.71   | 8.09    | 7.65    | 11.39   | 44.06      | 52.51   | 33.81   | 30.18   |
| <i>FaTPL2</i>       | 27.60   | 25.06   | 47.94   | 67.23   | 10.68      | 31.90   | 50.60   | 106.98  |
| <i>FaTPL3</i>       | 30.55   | 16.34   | 23.21   | 40.24   | 22.50      | 30.42   | 34.83   | 52.66   |
| <i>FaTPL4</i>       | 33.95   | 30.60   | 63.66   | 38.23   | 34.22      | 59.76   | 311.39  | 408.60  |
| <i>FaHDA6.1</i>     | 11.68   | 26.21   | 38.29   | 37.32   | 8.98       | 13.73   | 14.86   | 18.83   |
| <i>FaHDA6.2</i>     | 0.00    | 0.00    | 0.00    | 0.00    | 0.00       | 0.00    | 0.00    | 0.00    |
| <i>FaHDA19.1</i>    | 62.71   | 58.51   | 57.77   | 67.31   | 59.02      | 57.73   | 58.99   | 60.09   |
| <i>FaHDA19.2</i>    | 10.73   | 6.97    | 10.45   | 12.76   | 9.07       | 11.82   | 15.72   | 14.52   |
| <i>FaJAM1</i>       | 19.93   | 6.83    | 8.20    | 6.87    | 17.84      | 6.29    | 6.07    | 4.36    |
| <i>FaJAM2</i>       | 10.99   | 5.31    | 11.76   | 11.63   | 11.85      | 12.50   | 9.20    | 6.40    |

Expression data were extracted from accession numbers of *F. vesca* (Sanchez-Sevilla et al. 2017) and we renamed according to the present research gene nomenclature. *FaJAZ12* gene was not found in RNAseq experiments from Sanchez-Sevilla et al. (2017). Developmental stages correspond to GA (green achene), GR (green receptacle), RA (ripe achene), RR (ripe receptacle), TA (turning achene), TR (turning receptacle), WA (white achene), WR (white receptacle). COI1, coronatine insensitive 1; HDA, histone deacetylases; JAM, jasmonate-associated MYC2-like; JAZ, jasmonate ZIM-domain; NINJA, novel interactor of JAZ; TPL, TOPLLESS.
